# Supplementary material for: Kinetics of Catalytic Decarboxylation of Naphthenic Acids over HZSM-5 Zeolite Catalyst
Source: MDPI journal article supplement (doi:10.3390/catal12050495), 2022-04-28
Supplement: s1 [file s1]

## Supplementary Files:

Adsorption Rate Equation:

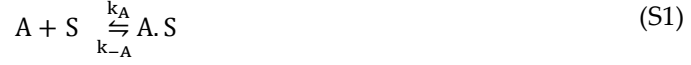

$$r_{ADS} = k_A C_A C_S - k_{-A} C_{A.S} \quad (S2)$$

$$K_A = \frac{k_A}{k_{-A}} \quad (S3)$$

$$r_{ADS} = k_A \left[ C_A C_S - \frac{C_{A.S}}{K_A} \right] \quad (S4)$$

Surface Reaction Rate Equation:

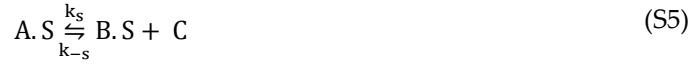

$$r_S = k_s C_{A.S} - k_{-s} C_{B.S} C_C \quad (S6)$$

$$K_S = \frac{k_s}{k_{-s}} \quad (S7)$$

$$r_S = k_s \left[ C_{A.S} - \frac{C_{B.S} C_C}{K_S} \right] \quad (S8)$$

Desorption Rate Equation:

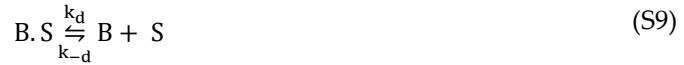

$$r_D = k_d C_{B.S} - k_{-d} C_B C_S \quad (S10)$$

$$K_D = \frac{k_d}{k_{-d}} \quad (S11)$$

$$r_D = k_d \left[ C_{B.S} - \frac{C_B C_S}{K_D} \right] \quad (S12)$$

If Adsorption of RCOOH is the determining step then

$$r_S = r_D = 0 \quad (S13)$$

$$r_S = k_s \left[ C_{A.S} - \frac{C_{B.S} C_C}{K_S} \right] = 0 \quad (S14)$$

$$C_{A.S} = \frac{C_{B.S} C_C}{K_S} \quad (S15)$$

$$r_D = k_d \left[ C_{B.S} - \frac{C_B C_S}{K_D} \right] = 0 \quad (S16)$$

$$K_B = \frac{1}{K_D} \quad (S17)$$

$$C_{B.S} = K_B C_B C_S \quad (S18)$$

$$C_{A.S} = \frac{K_B C_B C_S C_C}{K_S} \quad (S19)$$

Put them in Adsorption equation

$$r_{ADS} = k_A \left[ C_A C_S - \frac{K_B C_B C_S C_C}{K_A K_S} \right] \quad (S20)$$

$$r_{ADS} = k_A \left[ C_A - \frac{K_B C_B C_C}{K_A K_S} \right] C_S \quad (S21)$$

$$\text{Totalsites} = \text{Vacantsites} + \text{Occupiedsites} \quad (S22)$$

$$C_T = C_S + C_{A.S} + C_{B.S} \quad (S23)$$

$$C_T = C_S + \frac{K_B C_B C_S C_C}{K_S} + K_B C_B C_S \quad (S24)$$

$$C_T = C_S \left( 1 + \frac{K_B C_B C_C}{K_S} + K_B C_B \right) \quad (S25)$$

$$C_S = \frac{C_T}{\left( 1 + \frac{K_B C_B C_C}{K_S} + K_B C_B \right)} \quad (S26)$$

$$r_{ADS} = \frac{k_A C_T \left[ C_A - \frac{K_B C_B C_C}{K_A K_S} \right]}{\left( 1 + \frac{K_B C_B C_C}{K_S} + K_B C_B \right)} \quad (S27)$$

$$K = \frac{K_A K_S}{K_B} \quad (S28)$$

$$K_R = \frac{K_B}{K_S} \quad (S29)$$

$$r_{ADS} = \frac{k_A \left[ C_A - \frac{C_B C_C}{K} \right]}{(1 + K_R C_B C_C + K_B C_B)} \quad (S30)$$

If Surface Reaction of RCOOH.S is the determining step then

$$r_{ADS} = r_D = 0 \quad (S31)$$

$$r_{ADS} = k_A \left[ C_A C_S - \frac{C_{A.S}}{K_A} \right] = 0 \quad (S32)$$

$$C_{A.S} = K_A C_A C_S \quad (S33)$$

$$r_D = k_d \left[ C_{B.S} - \frac{C_B C_S}{K_D} \right] = 0 \quad (S34)$$

$$C_{B.S} = K_B C_B C_S \quad (S35)$$

Put them in the Surface Reaction equation

$$r_S = k_s \left[ K_A C_A C_S - \frac{K_B C_B C_S C_C}{K_S} \right] \quad (S36)$$

$$r_S = k_s C_S \left[ K_A C_A - \frac{K_B C_B C_C}{K_S} \right] \quad (S37)$$

$$\text{Total sites} = \text{Vacant sites} + \text{Occupied sites} \quad (S38)$$

$$C_T = C_S + C_{A.S} + C_{B.S} \quad (S39)$$

$$C_T = C_S + K_A C_A C_S + K_B C_B C_S \quad (S40)$$

$$C_T = C_S (1 + K_A C_A + K_B C_B) \quad (S41)$$

$$C_S = \frac{C_T}{(1 + K_A C_A + K_B C_B)} \quad (S42)$$

$$r_S = \frac{k_s C_T \left[ K_A C_A - \frac{K_B C_B C_C}{K_S} \right]}{(1 + K_A C_A + K_B C_B)} \quad (S43)$$

$$r_S = \frac{k_s C_T K_A \left[ C_A - \frac{K_B C_B C_C}{K_A K_S} \right]}{(1 + K_A C_A + K_B C_B)} \quad (S44)$$

$$r_S = \frac{k \left[ C_A - \frac{C_B C_C}{K} \right]}{(1 + K_A C_A + K_B C_B)} \quad (S45)$$

If Desorption of RH.S is the determining step then

$$r_{ADS} = r_S = 0 \quad (S46)$$

$$r_{ADS} = k_A \left[ C_A C_S - \frac{C_{A.S}}{K_A} \right] = 0 \quad (S47)$$

$$C_{A.S} = K_A C_A C_S \quad (S48)$$

$$r_S = k_s \left[ C_{A.S} - \frac{C_{B.S} C_C}{K_S} \right] = 0 \quad (S49)$$

$$C_{B.S} = \frac{C_{A.S}K_S}{C_C} \quad (S50)$$

$$C_{B.S} = \frac{K_A C_A C_S K_S}{C_C} \quad (S51)$$

$$r_D = k_d C_S \left[ \frac{K_A C_A K_S}{C_C} - \frac{C_B}{K_D} \right] \quad (S52)$$

$$r_D = k_d C_S K_A K_S \left[ \frac{C_A}{C_C} - \frac{C_B}{K_P} \right] \quad (S53)$$

$$\text{Total sites} = \text{Vacant sites} + \text{Occupied sites} \quad (S54)$$

$$C_T = C_S + C_{A.S} + C_{B.S} \quad (S55)$$

$$C_T = C_S + K_A C_A C_S + \frac{K_A C_A C_S K_S}{C_C} \quad (S56)$$

$$C_T = C_S \left( 1 + K_A C_A + \frac{K_A C_A K_S}{C_C} \right) \quad (S57)$$

$$C_S = \frac{C_T}{\left( 1 + K_A C_A + \frac{K_A C_A K_S}{C_C} \right)} \quad (S58)$$

$$r_D = \frac{k_d K_A K_S C_T \left[ \frac{C_A}{C_C} - \frac{C_B}{K_P} \right]}{\left( 1 + K_A C_A + \frac{K_A C_A K_S}{C_C} \right)} \quad (S59)$$

$$r_D = \frac{k \left[ \frac{C_A}{C_C} - \frac{C_B}{K_P} \right]}{\left( 1 + K_A C_A + \frac{K_R C_A}{C_C} \right)} \quad (S60)$$
